# Supplementary material for: Ultrafine Rh nanocrystals grown onto a boron and nitrogen codoped carbon support with a horn-shaped structure for highly efficient methanol oxidation
Source: Royal Society of Chemistry journal article supplement (doi:10.1039/d2dt02010f), 2022-01-01
Supplement: d2dt02010f1.pdf [file d2dt02010f1.pdf]

## Electronic Supplementary Information

### Ultrafine Rh nanocrystals grown onto boron and nitrogen codoped carbon support with a horn-shaped structure for highly efficient methanol oxidation

Xiangjie Guo,<sup>a</sup> Jie Xiong,<sup>a</sup> Qi Wang,<sup>a</sup> Jian Zhang,<sup>b</sup> Haiyan He,<sup>a</sup> Huajie Huang<sup>\*a</sup>

<sup>a</sup>College of Mechanics and Materials, Hohai University, Nanjing 210098, China

<sup>b</sup>New Energy Technology Engineering Lab of Jiangsu Province, College of Science, Nanjing University of Posts & Telecommunications (NUPT), Nanjing 210023, China

\*E-mail: huanghuajie@hhu.edu.cn

#### Supplementary Results:

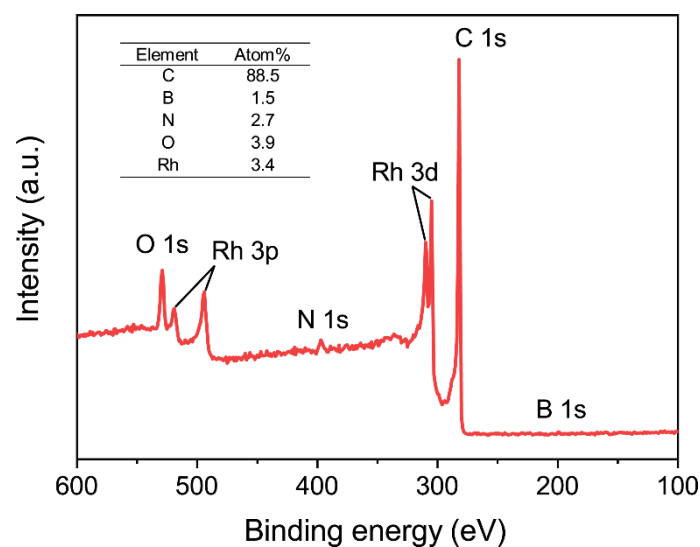

**Fig. S1** The XPS survey spectrum and elemental quantitative analysis of the Rh/BNCNH hybrid.

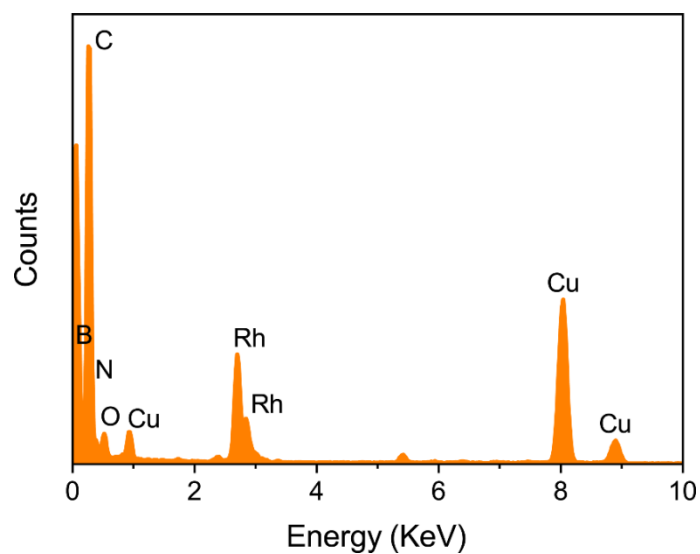

**Fig. S2** EDX spectrum of Rh(20%)/BNCNH catalyst verifies the presence of B, C, N, O, and Rh components in the hybrid.

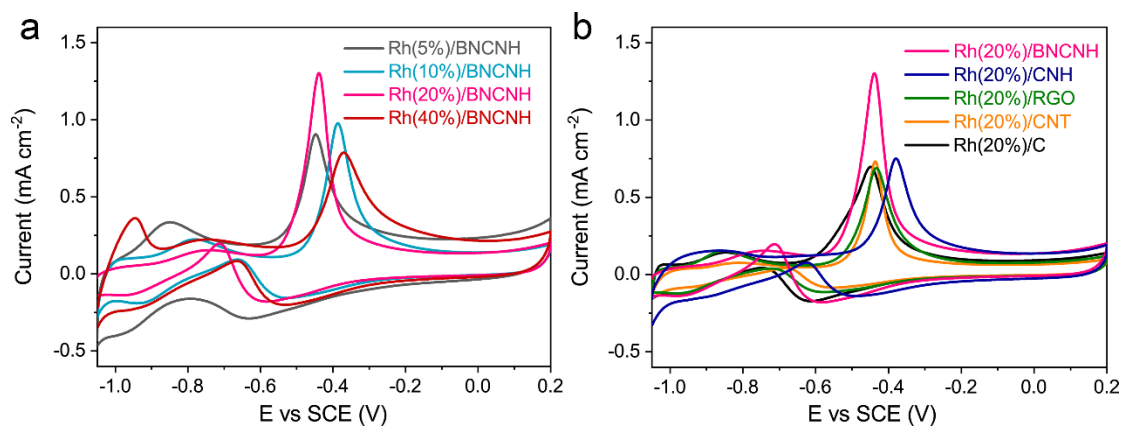

**Fig. S3** The ECSA-normalized CV curves of (a) the Rh/BNCNH with different Rh dosages, and (b) Rh(20%)/CNH, Rh(20%)/RGO, Rh(20%)/CNT, and Rh(20%)/C catalysts in 1 M KOH with 1 M CH<sub>3</sub>OH solution at 50 mV s<sup>-1</sup>.

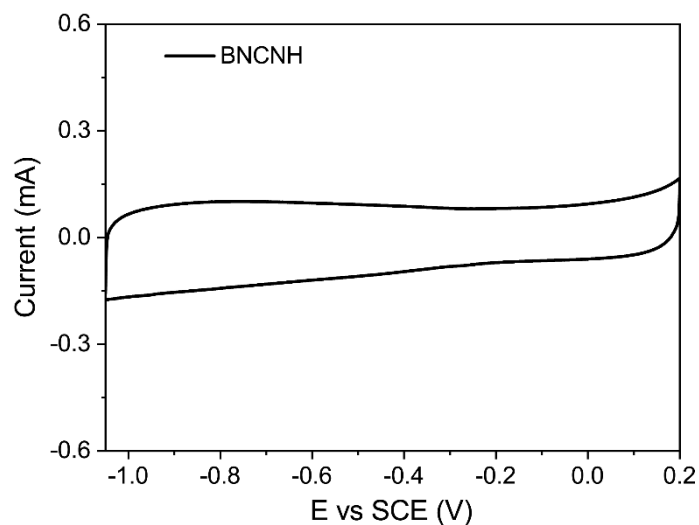

**Fig. S4** The CV curve of the BNCNH catalyst in 1 M KOH with 1 M CH<sub>3</sub>OH solution at 50 mV s<sup>-1</sup>.

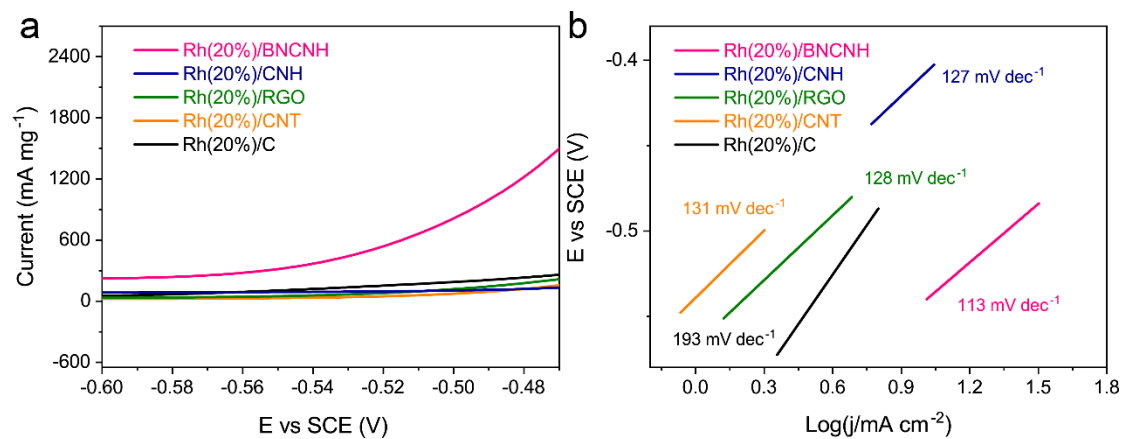

**Fig. S5** (a) Linear sweep voltammeters of Rh(20%)/BNCNH, Rh(20%)/CNH, Rh(20%)/RGO, Rh(20%)/CNT, and Rh(20%)/C electrodes in 1 M KOH with 1 M CH<sub>3</sub>OH solution at 50 mV s<sup>-1</sup>. (b) Tafel plots of the Rh(20%)/BNCNH, Rh(20%)/CNH, Rh(20%)/RGO, Rh(20%)/CNT, and Rh(20%)/C electrodes.

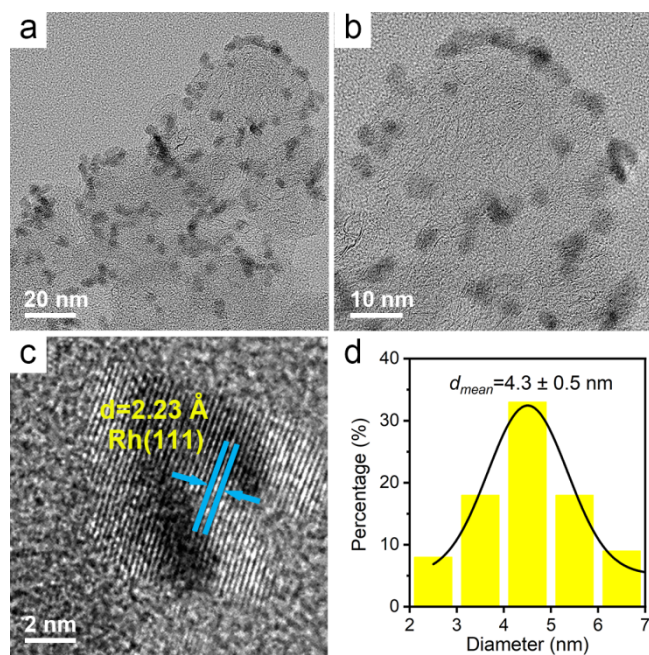

**Fig. S6** Typical (a-b) TEM, (c) HRTEM images, and (d) Rh particle size distribution of the Rh/BNCNH catalyst after the stability test.

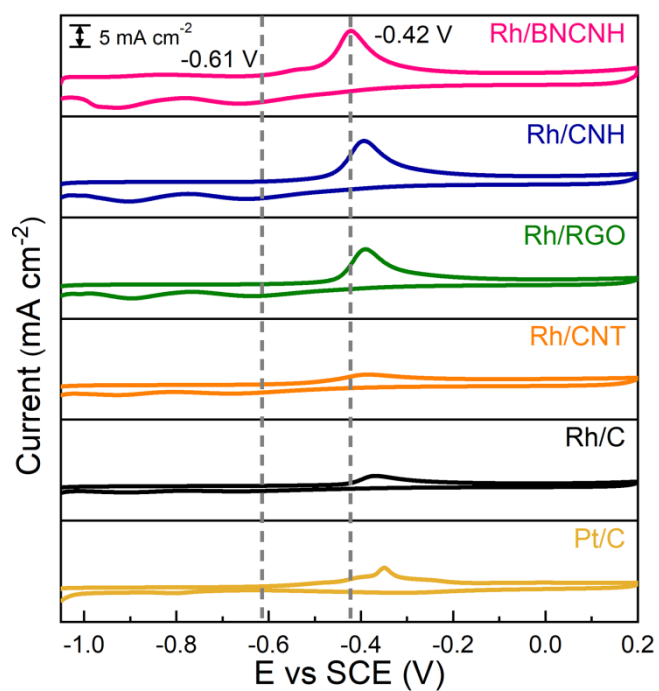

**Fig. S7** CO stripping voltammograms for the Rh/BNCNH, Rh/CNH, Rh/RGO, Rh/CNT, Rh/C, and Pt/C electrodes in 1 M KOH solution at 50 mV s<sup>-1</sup>.

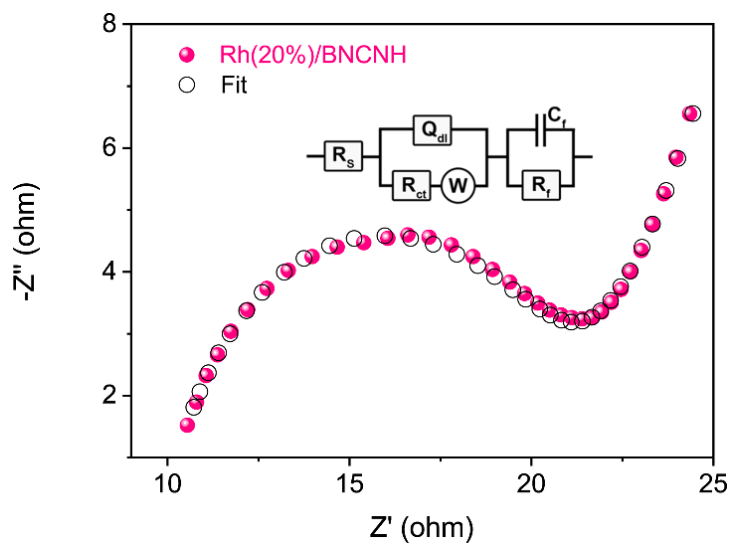

**Fig. S8** AC impedance spectrum of the Rh(20%)/BNCNH electrode and the corresponding fitting curve. The inset is the equivalent circuit used to fit the spectrum.

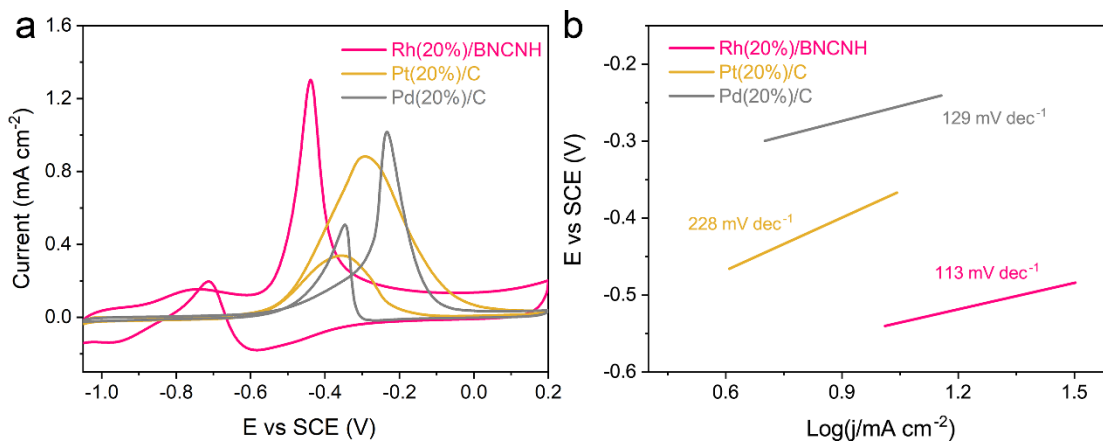

**Fig. S9** (a) The ECSA-normalized CV curves of Rh(20%)/BNCNH, Pt(20%)/C, and Pd(20%)/C catalysts in 1 M KOH with 1 M CH<sub>3</sub>OH solution at 50 mV s<sup>-1</sup>. (b) Tafel plots of the Rh(20%)/BNCNH, Pt(20%)/C, and Pd(20%)/C electrodes.

**Table S1** Electrochemical behaviors on different catalysts in DMFC condition

| Electrode     | ECSA<br>( $\text{m}^2 \text{g}^{-1}$ ) | Mass activity<br>( $\text{mA mg}^{-1}$ ) | Specific activity<br>( $\text{mA cm}^{-2}$ ) |
|---------------|----------------------------------------|------------------------------------------|----------------------------------------------|
| Rh(5%)/BNCNH  | 42.5                                   | 270.3                                    | 0.64                                         |
| Rh(10%)/BNCNH | 132.3                                  | 1280.6                                   | 0.97                                         |
| Rh(20%)/BNCNH | 182.4                                  | 2350.5                                   | 1.29                                         |
| Rh(40%)/BNCNH | 93.6                                   | 750.2                                    | 0.80                                         |
| Rh(20%)/CNH   | 68.3                                   | 575.4                                    | 0.84                                         |
| Rh(20%)/RGO   | 53.7                                   | 369.7                                    | 0.69                                         |
| Rh(20%)/CNT   | 46.4                                   | 339.3                                    | 0.73                                         |
| Rh(20%)/C     | 42.8                                   | 290.1                                    | 0.68                                         |
| Pt(20%)/C     | 59.5                                   | 525.0                                    | 0.88                                         |
| Pd(20%)/C     | 65.2                                   | 663.0                                    | 1.01                                         |

**Table S2** Comparison of the methanol oxidation behaviors on the Rh(20%)/BNCNH catalyst with various state-of-the-art Rh-based electrocatalysts.

| Electrode         | ECSA<br>( $\text{m}^2 \text{g}^{-1}$ ) | Mass activity<br>( $\text{mA mg}^{-1}$ ) | Electrolyte                                                          | Ref.      |
|-------------------|----------------------------------------|------------------------------------------|----------------------------------------------------------------------|-----------|
| Rh(20%)/BNCNH     | 182.4                                  | 2350.5                                   | 1 mol L <sup>-1</sup> KOH+1 mol L <sup>-1</sup> CH <sub>3</sub> OH   | This work |
| Rh/3D graphene    | 79.6                                   | 498.9                                    | 1 mol L <sup>-1</sup> KOH+1 mol L <sup>-1</sup> CH <sub>3</sub> OH   | [23]      |
| Rh sheet/graphene | 48.7                                   | 264.0                                    | 1 mol L <sup>-1</sup> KOH+1 mol L <sup>-1</sup> CH <sub>3</sub> OH   | [42]      |
| Rh sheets         | 73.1                                   | 333.0                                    | 1 mol L <sup>-1</sup> KOH+0.5 mol L <sup>-1</sup> CH <sub>3</sub> OH | [43]      |
| Rh nanowires      | 144.2                                  | 722.0                                    | 1 mol L <sup>-1</sup> KOH+1 mol L <sup>-1</sup> CH <sub>3</sub> OH   | [44]      |
| Rh nanotubes      | 60.9                                   | 325.0                                    | 1 mol L <sup>-1</sup> KOH+1 mol L <sup>-1</sup> CH <sub>3</sub> OH   | [40]      |
| Rh dendrites      | 43.4                                   | 255.6                                    | 1 mol L <sup>-1</sup> KOH+1 mol L <sup>-1</sup> CH <sub>3</sub> OH   | [45]      |

**Table S3.** The charge transfer resistances of different catalysts.

| Electrode     | $R_{ct}$    |           |
|---------------|-------------|-----------|
|               | Value (ohm) | Error (%) |
| Rh(20%)/BNCNH | 10.2        | 2.2       |
| Rh(20%)/CNH   | 8.4         | 3.1       |
| Rh(20%)/RGO   | 13.6        | 2.9       |
| Rh(20%)/CNT   | 16.3        | 4.7       |
| Rh(20%)/C     | 7438.5      | 4.1       |
